# Supplementary material for: Use of Ultrasmall Core-Shell Fluorescent Silica Nanoparticles for Image-Guided Sentinel Lymph Node Biopsy in Head and Neck Melanoma: A Nonrandomized Clinical Trial
Source: PubMed Central journal article supplement (PMC7974643; doi:10.1001/jamanetworkopen.2021.1936), 2021-03-18
Supplement: jamanetwopen-e211936-s002.pdf [file jamanetwopen-e211936-s002.pdf]

## Supplemental Online Content

Zanoni DK, Stambuk HE, Madajewski B, et al. Use of ultras-small core-shell fluorescent silica nanoparticles for image-guided sentinel lymph node biopsy in head and neck melanoma: a nonrandomized clinical trial. *JAMA Netw Open*. 2021;4(3):e211936. doi:10.1001/jamanetworkopen.2021.1936

**eAppendix.** Supplementary Methods

**eFigure 1.** Dose Escalation Procedure in the Surgical Suite

**eFigure 2.** Deep Tissue SLN Detection in the Intraparotid Region

**eFigure 3.** Fluorescence Signal of a Metastatic SLN Through Intact Skin

**eTable 1.** Summary of QC Test Results of Representative C' Dot Batches

**eTable 2.** Performance of cRGDY-PEG-Cy5.5-C' Dots for Ex Vivo SLN Identification

**eTable 3.** Comparison of cRGDY-PEG-Cy5.5-C' Dots to Standard of Care

**eReferences.**

This supplemental material has been provided by the authors to give readers additional information about their work.

## e Appendix. Supplementary Methods

### **NCCN Guidelines for Head and Neck Melanoma Treatment.**

The National Comprehensive Cancer Network<sup>1</sup> (NCCN) guidelines for melanoma treatment in the head and neck recommend SLN biopsy for patients with clinical Stage IB or II disease. It considers SLN biopsy for patients with Stage IA disease who have adverse features (*e.g.*, very high mitotic index, particularly in the setting of young age, and/or lymphovascular invasion) or when the adequacy of microstaging is uncertain (positive deep margins <sup>99m</sup>Tc sulfur colloid).

### **SLN Lymphoscintigraphy and SPECT-CT**

Routine pre-operative four-quadrant injection of <sup>99m</sup>Tc sulfur colloid (<sup>99m</sup>TcSC; 80 MBq, 0.1 mL) about the primary melanoma site was performed on the day of surgery, followed by planar gamma camera lymphoscintigraphy and single-photon emission CT/CT (SPECT/CT) imaging of the draining lymph node basin about 0.5 – 2 hours post-injection. Once the patient was placed under general anesthesia, an experienced head and neck radiologist used anatomical landmarks and measurements from SPECT/CT images to mark the skin overlying the location of the SLN/s in each subject. These marks were used to optimize patient positioning in the operative suite and plan the surgical approach prior to conducting intraoperative fluorescence imaging and surgical excision of the primary lesion and SLNs.

### **Gamma Probe Detection of Radioactive SLNs Using <sup>99m</sup>TcSC**

<sup>99m</sup>Tc sulfur colloid radioactivity assessments were made per standard practice guidelines using a handheld intraoperative gamma probe with a collimator in place. The criteria for defining a “hot” node has been established for two decades in clinical practice and remains consistent for our current practice, including patients in this trial. Specifically, we identify SLN position based on preoperative lymphoscintigraphy, record transcutaneous SLN counts, background nodal basin count, and primary tumor count as baseline measurements prior to SLN biopsy, using the gamma probe for SLN *in vivo* assessment intraoperatively. Counts of the excised SLN are then acquired, and excision of additional nodes continues until the bed count drops to <10% of highest SLN *ex vivo* count.

### **Particle Synthesis and Characterization**

Ultrasmall, NIR fluorescent core-shell silica nanoparticles were produced using an aqueous synthesis approach, as detailed in prior publications<sup>2,3</sup>. In brief, using a one-pot method, a functionalized Cy5.5 dye derivative, conjugated to a silane, was co-condensed with tetramethylorthosilicate (TMOS) to form a covalent Cy5.5 dye-encapsulating silica core in water at slightly basic pH. Particle growth was terminated by addition of  $\alpha,\omega$ -functionalized poly(ethylene glycol) (PEG), cRGDY-PEG-silane, and regular PEG-silane, producing a PEG brush shell with a fraction of the PEG chains carrying a cRGDY moiety in  $\omega$ -position (*i.e.* on the chain end)<sup>4</sup>.

Resulting C' dot synthesis batches (or cRGDY-PEG-Cy5.5-C' dots) were purified using gel permeation chromatography (GPC), sterile processed, and characterized by a series of quality control (QC) tests, including fluorescence correlation spectroscopy (FCS) and UV-Vis spectroscopy, as described earlier<sup>2,5</sup>. QC test results summarized in **eTable 1** demonstrated high product quality and reproducibility across different production batches. On average, C' dots for clinical trials had about 1-2 Cy5.5 dyes and about 20 cRGDY integrin-targeting moieties per particle.

### **Multichannel Fluorescence Camera System Specifications and Real-time Optical Imaging**

The imaging head of the camera system was positioned 10-30 cm above the surgical field. The overhead lights in the operating room were turned away from the operating field, and the surgical field was examined with the fluorescence camera system (irradiance < 10 mW/cm<sup>2</sup>; limit for skin 200 mW/cm<sup>2</sup>) to maximize detection of optical signal. Camera exposure times were less than 35 ms. Following sterile preparation of the surgical field, real-time optical scanning was performed of the particle injection site and adjacent nodal basin. Image streams were recorded from the start of injection through to biopsy and *ex vivo* imaging to document lymphatic flow and accumulation of cRGDY-PEG-Cy5.5-C' dots in SLNs. The camera was used in video mode (25-30 frames per second) to map dynamic changes in particle transit from the injection site into the draining lymphatics and nodes with successive surgical exposure. Two-dimensional large field-of-view NIR images of the adjacent soft tissue structures were also acquired for assessing the full extent of nodal groups at risk for metastasis.

### Signal-to-Background (SBR) Measurements of Fluorescent *In Situ* SLNs

SBR values are computed off-line, outside of the operating room setting, using a software analysis package, Architector Image Viewer (version 1.9.0), from Quest Medical Imaging, the manufacturer of the multichannel fluorescence camera system. The software is used to compute mean optical signal intensity values by selecting a specific region-of-interest (ROI) within the SLN (*in situ*) and an ROI of the surrounding tissues, the latter is used to calculate the background signal. The ROIs are subdivided into 6 regions, each region displaying a signal intensity; these signal intensity values are averaged by the software to derive mean optical signal intensities within the SLN and of the background tissues. SBRs can then be subsequently derived by dividing the mean signal intensity of the SLN by the mean signal intensity of the background. To note, SBRs cannot be calculated for *ex vivo* nodes, as there is no surrounding tissue for a background measurement.

### Histopathology

Excised tissue specimens were collected, counted, and assessed optically using the same procedure as above. Specimens were histologically processed and evaluated according to standard protocols, including routine H&E staining and immunohistochemistry for melanoma biomarkers (S-100, HMB-45). Histologic results were correlated with imaging findings.

**eFigure 1. Dose Escalation Procedure in the Surgical Suite**

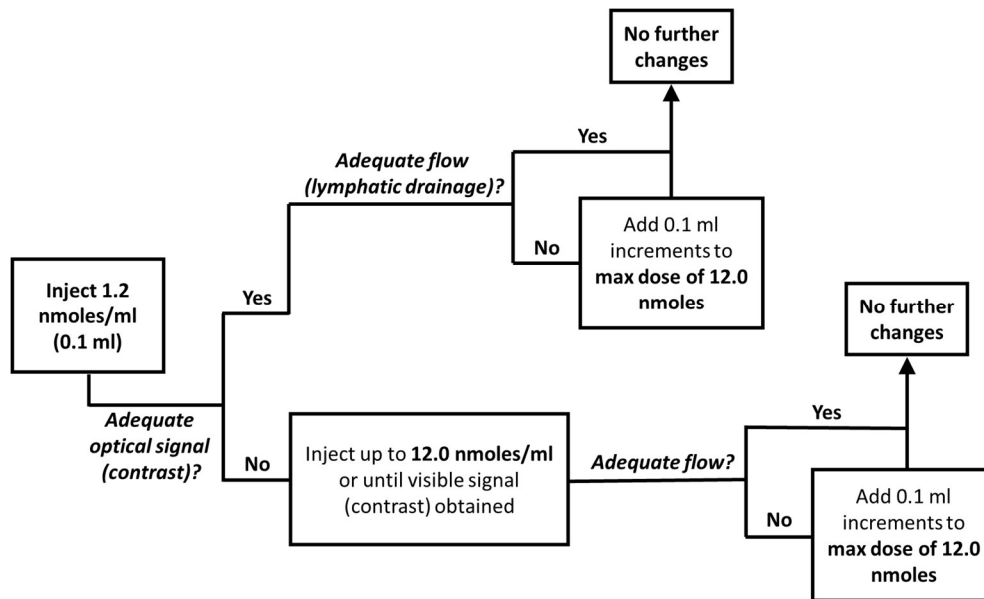

**eFigure 2. Deep Tissue SLN Detection in the Intraparotid Region**

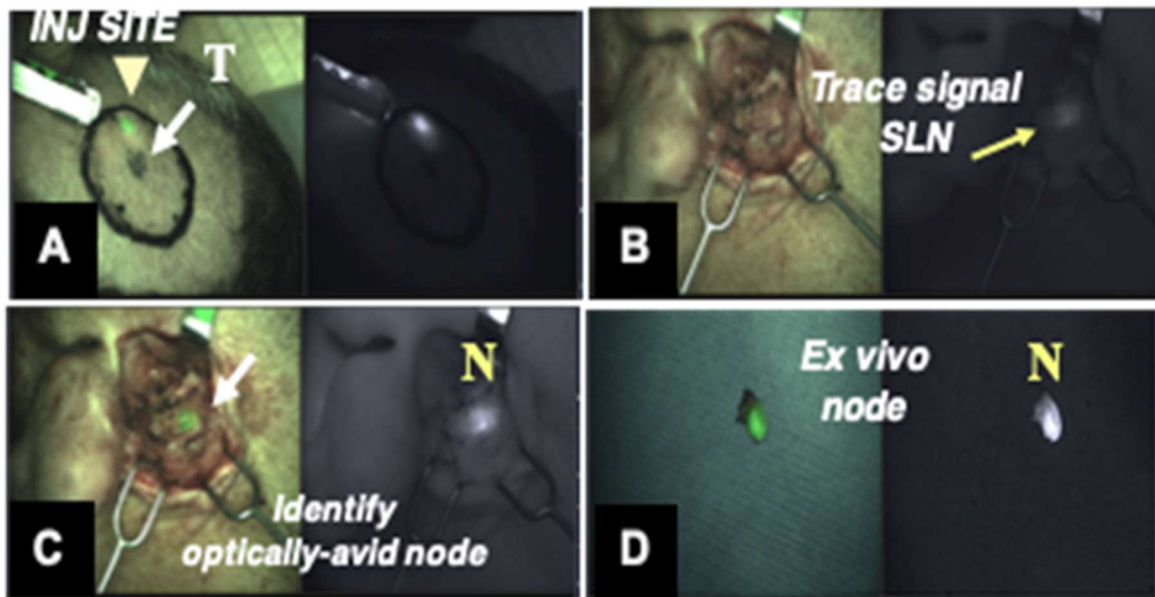

eFigure 2. 38 yr old male with a primary scalp melanoma (T) and detection of an intraparotid node 2 cm deep to the skin surface.

**eFigure 3. Fluorescence Signal of a Metastatic SLN Through Intact Skin**

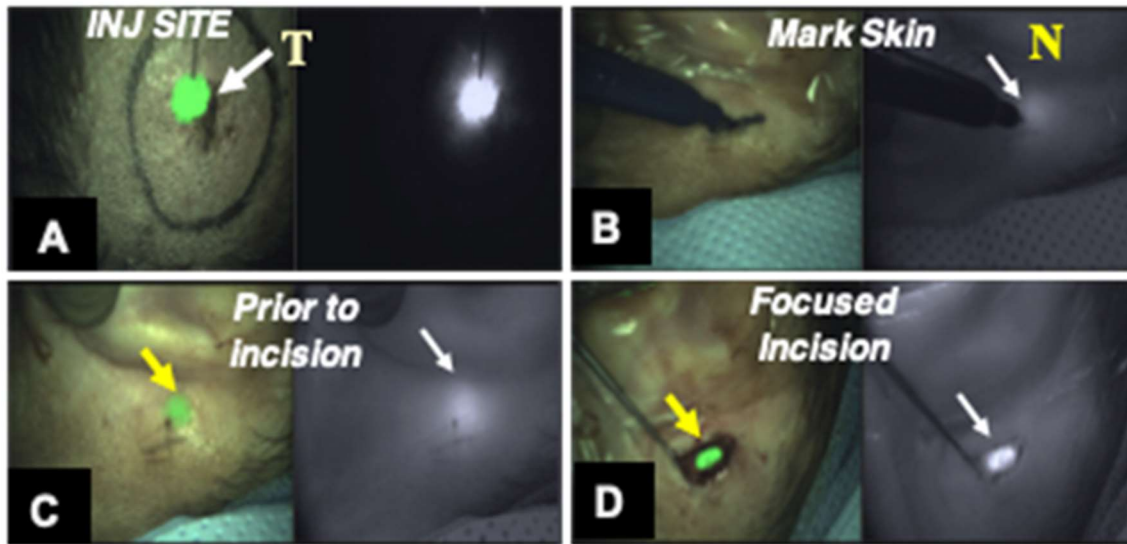

eFigure 3. 62 yr old male with a scalp melanoma (T) and fluorescence signal (arrows) overlying the site of a metastatic post-auricular SLN through the intact skin.

**eTable 1. Summary of QC Test Results of Representative C' Dot Batches**

| <b>Attributes (Test Methods)</b>                            | <b>Lot #1</b>                          | <b>Lot #2</b>                          | <b>Lot #3</b>                          |
|-------------------------------------------------------------|----------------------------------------|----------------------------------------|----------------------------------------|
| <b>Purity (by GPC)</b>                                      | Purity >99%                            | Purity >99%                            | Purity >99%                            |
| <b>Hydrodynamic diameter (by FCS)</b>                       | 6.3nm                                  | 6.4nm                                  | 6.6nm                                  |
| <b>Concentration (by FCS)</b>                               | 15.0 $\mu$ M                           | 15.0 $\mu$ M                           | 15.0 $\mu$ M                           |
| <b>Brightness (by FCS)</b>                                  | 2.3 times brighter than free Cy5.5 dye | 2.3 times brighter than free Cy5.5 dye | 2.4 times brighter than free Cy5.5 dye |
| <b>Number of Cy5.5 per particle (by photometer and FCS)</b> | 1.6                                    | 1.7                                    | 1.5                                    |
| <b>Number of cRGDY per particle (by photometer and FCS)</b> | 26                                     | 19                                     | 24                                     |

**eTable 2. Performance of cRGDY-PEG-Cy5.5-C' Dots for Ex Vivo SLN Identification**

| Case | Phase | Dose (nanomoles) | Time from inj to nodal visualization | Pathology of resected LNs                                                                 | Number of SLNs resected | Transcutaneous neck count | 1st ex vivo SLN count | 1st ex vivo SLN signal | 1st SLN path | 2nd ex vivo SLN count | 2nd ex vivo SLN signal | 2nd SLN path        | 3rd ex vivo SLN count | 3rd ex vivo SLN signal | 3rd SLN path | Residual bed count |
|------|-------|------------------|--------------------------------------|-------------------------------------------------------------------------------------------|-------------------------|---------------------------|-----------------------|------------------------|--------------|-----------------------|------------------------|---------------------|-----------------------|------------------------|--------------|--------------------|
| 1    | I     | 0.6              | ~30 min                              | SLN 1 negative for melanoma                                                               | 1                       | NR                        | NR                    | yes                    | benign       | N/A                   | N/A                    | N/A                 | N/A                   | N/A                    | N/A          | N/A                |
| 2    | I     | 1.2              | ~34 min                              | R. neck SLN 1, 2, and 3 negative for melanoma                                             | 3                       | 914                       | 1620                  | yes                    | benign       | 1021                  | ~0                     | benign              | 1466                  | ~0                     | benign       | ~0                 |
| 3    | I     | 1.5              | ~69 min                              | L. neck SLN negative for melanoma                                                         | 1                       | NR                        | 1107                  | yes                    | benign       | N/A                   | N/A                    | N/A                 | N/A                   | N/A                    | N/A          | ~0                 |
| 4    | I     | 1.2              | ~66 min                              | R. neck SLN #1 negative for melanoma<br>R. neck SLN #2 negative for melanoma              | 2                       | 110                       | 110                   | yes                    | benign       | 110                   | yes                    | benign              | N/A                   | N/A                    | N/A          | ~0                 |
| 5    | I     | 2.5              | ~55 min                              | L. retroauricular LN negative for melanoma<br>L. retroauricular LN #2 metastatic melanoma | 2                       | NR                        | 364                   | yes                    | benign       | 314                   | yes                    | metastatic melanoma | N/A                   | N/A                    | N/A          | 148                |

|   |   |     |         |                                                                                                                                                                                                                                     |   |      |      |     |                           |     |     |     |     |     |     |     |
|---|---|-----|---------|-------------------------------------------------------------------------------------------------------------------------------------------------------------------------------------------------------------------------------------|---|------|------|-----|---------------------------|-----|-----|-----|-----|-----|-----|-----|
| 6 | I | 2.5 | ~40 min | L. retroauricular SLN negative for melanoma                                                                                                                                                                                         | 1 | NR   | 703  | yes | benign                    | N/A | N/A | N/A | N/A | N/A | N/A | 40  |
| 7 | I | 2.5 | N/A     | L. ext jugular "LN1" benign fibroadipose tissue; no LN. L. ext jugular "LN2"-benign fibroadipose tissue; no LN. L. ext jugular "NS LN"-benign fibroadipose tissue; no LN L. occipital LN-intracapsular epithelial cell LN aggregate | 1 | 464  | 221  | yes | benign                    | N/A | N/A | N/A | N/A | N/A | N/A | ~0  |
| 8 | I | 0.5 | ~60 min | L. neck, level 2, SLN #1; micro-metastatic melanoma                                                                                                                                                                                 | 1 | 2692 | 1119 | yes | micro-metastatic melanoma | N/A | N/A | N/A | N/A | N/A | N/A | 151 |
| 9 | I | 2.5 | ~60 min | L. neck, SLN #1; metastatic melanoma                                                                                                                                                                                                | 1 | 369  | 2085 | yes | metastatic melanoma       | N/A | N/A | N/A | N/A | N/A | N/A | 265 |



|    |   |     |           |                                                                                                                                                                  |   |                              |      |           |                           |      |           |                                |      |           |        |     |
|----|---|-----|-----------|------------------------------------------------------------------------------------------------------------------------------------------------------------------|---|------------------------------|------|-----------|---------------------------|------|-----------|--------------------------------|------|-----------|--------|-----|
| 10 | I | 2   | ~44 min   | R. neck, SLN #1 negative for melanoma<br>R. neck, SLN #2 negative for melanoma                                                                                   | 2 | 2361                         | 7367 | yes       | benign                    | 920  | yes       | benign                         | N/A  | N/A       | N/A    | 263 |
| 11 | I | 1.5 | no camera | L. neck SLN #1 micro-metastatic melanoma<br>L. neck SLN #2 negative for melanoma<br>L. neck SLN #3 negative for melanoma<br>L. neck SLN #4 negative for melanoma | 4 | Level II 1706<br>Level V 606 | 3718 | no camera | micro-metastatic melanoma | 1570 | no camera | benign                         | 1930 | no camera | benign | 28  |
| 12 | I | 1.5 | ~50 min   | L. neck SLN #1 negative for melanoma<br>L. neck SLN #2; lymphoid/adipose tissue,                                                                                 | 2 | NR                           | 198  | yes       | benign                    | 142  | no        | benign lymphoid tissue, no SLN | 1245 | no        | benign | ~0  |

|                  |                   |                              |                                                  |                                                                                                                                                                  |                                     |                                       |                                   |                                    |                               |                                   |                                    |                               |                                   |                                    |                               |                                |
|------------------|-------------------|------------------------------|--------------------------------------------------|------------------------------------------------------------------------------------------------------------------------------------------------------------------|-------------------------------------|---------------------------------------|-----------------------------------|------------------------------------|-------------------------------|-----------------------------------|------------------------------------|-------------------------------|-----------------------------------|------------------------------------|-------------------------------|--------------------------------|
|                  |                   |                              |                                                  | no SLN L. neck SLN #3 negative for melanoma                                                                                                                      |                                     |                                       |                                   |                                    |                               |                                   |                                    |                               |                                   |                                    |                               |                                |
| 13               | I                 | 2                            | no camera                                        | L. "carotid" tissue; SLN and salivary gland tissue; negative for melanoma. L. "carotid" LN; One non-sentinel LN and salivary gland tissue; negative for melanoma | 1                                   | 461                                   | 919                               | no camera                          | benign                        | no                                | no                                 | N/A                           | N/A                               | N/A                                | N/A                           | ~0                             |
| 14               | I                 | 4                            | ~54 min                                          | R. neck SLN #1; negative                                                                                                                                         | 1                                   |                                       | 471                               | yes                                | benign                        | N/A                               | N/A                                | N/A                           | N/A                               | N/A                                | N/A                           | 30                             |
| Case (Continued) | Phase (Continued) | Dose (nanomoles) (Continued) | Time from inj to first visualization (Continued) | Pathology of resected LNs (Continued)                                                                                                                            | Number of SLNs resected (Continued) | Transcutaneous neck count (Continued) | 1st ex vivo SLN count (Continued) | 1st ex vivo SLN signal (Continued) | 1st SLN pathology (Continued) | 2nd ex vivo SLN count (Continued) | 2nd ex vivo SLN signal (Continued) | 2nd SLN pathology (Continued) | 3rd ex vivo SLN count (Continued) | 3rd ex vivo SLN signal (Continued) | 3rd SLN pathology (Continued) | Residual bed count (Continued) |
| 15               | I                 | 2.5                          | ~47 min                                          | R. neck ext jugular LN; negative for melanoma.                                                                                                                   | 1                                   | SLN 1: 380<br>SLN 2: 380              | 344                               | yes                                | benign                        | N/A                               | N/A                                | N/A                           | N/A                               | N/A                                | N/A                           | ~0                             |

|    |    |   |          |                                                                                                 |   |      |      |     |                     |                 |     |        |     |     |     |     |
|----|----|---|----------|-------------------------------------------------------------------------------------------------|---|------|------|-----|---------------------|-----------------|-----|--------|-----|-----|-----|-----|
| 16 | II | 2 | ~ 81 min | R. neck level 2 SLN #1; Negative for melanoma<br>R. neck level 2, SLN #2; negative for melanoma | 2 | 1227 | 8535 | yes | benign              | 303             | no  | benign | N/A | N/A | N/A | ~0  |
| 17 | II | 2 | ~53 min  | L. post-auricular SLN; metastatic melanoma                                                      | 1 | 2671 | 3982 | yes | metastatic melanoma | N/A             | N/A | N/A    | N/A | N/A | N/A | 120 |
| 18 | II | 2 | ~ 59 min | Right parotid SLN; negative for melanoma.                                                       | 1 | 2210 | 2210 | yes | benign              | N/A             | N/A | N/A    | N/A | N/A | N/A | 451 |
| 19 | II | 2 | ~ 70 min | L. neck level 2b, SLN#1 negative for melanoma<br>L. neck level Va, SLN #2 negative for melanoma | 2 | 200  | 238  | yes | benign              | 339             | yes | benign | N/A | N/A | N/A | 43  |
| 20 | II | 2 | ~ 53 min | R. neck ext jugular SLN #1; negative for melanoma                                               | 2 | ND   | 116  | yes | benign              | no gamma counts | yes | benign | N/A | N/A | N/A | ~0  |

|    |    |   |          |                                                                                                  |   |                           |     |     |        |      |                     |        |     |     |     |     |  |
|----|----|---|----------|--------------------------------------------------------------------------------------------------|---|---------------------------|-----|-----|--------|------|---------------------|--------|-----|-----|-----|-----|--|
|    |    |   |          | R. neck level 2 SLN #2; negative for melanoma                                                    |   |                           |     |     |        |      |                     |        |     |     |     |     |  |
| 21 | II | 2 | ~ 26 min | R. neck level 2 SLN #1; negative for melanoma<br>R. neck level 3, SLN #2; negative for melanoma  | 2 | 340                       | 354 | yes | benign | 331  | yes                 | benign | N/A | N/A | N/A | 300 |  |
| 22 | II | 2 | ~ 46 min | L. neck occipital SLN #1 negative for melanoma<br>L. neck occipital SLN #2 negative for melanoma | 2 | 383                       | 569 | yes | benign | 1469 | yes                 | benign | N/A | N/A | N/A | 20  |  |
| 23 | II | 2 | ~ 23 min | R. neck ext jugular SLN #1 negative for melanoma<br>R. neck periaxial SLN# 2 negative for        | 2 | SLN #1: 311<br>SLN #2: ND | 380 | yes | benign | 574  | yes,<br>(3 mm node) | benign | N/A | N/A | N/A | 14  |  |

|    |    |   |          |                                                                                          |   |                            |      |     |                     |      |     |        |     |     |     |     |  |
|----|----|---|----------|------------------------------------------------------------------------------------------|---|----------------------------|------|-----|---------------------|------|-----|--------|-----|-----|-----|-----|--|
|    |    |   |          | melanoma                                                                                 |   |                            |      |     |                     |      |     |        |     |     |     |     |  |
| 24 | II | 2 | ~ 34 min | R. ext jugular SLN #1 metastatic melanoma<br>R. ext jugular SLN #2 negative for melanoma | 2 | SLN #1: 905<br>SLN #2: 801 | 3154 | yes | metastatic melanoma | 5272 | yes | benign | N/A | N/A | N/A | 267 |  |

Abbreviations: SNL, sentinel lymph node; NR, not recorded; ND, not detected; R, right; L, left; ext, external; inj, injection; path, pathology

**eTable 3. Comparison of cRGDY-PEG-Cy5.5-C' Dots to Standard of Care**

|                        | <b>Standard of care<br/><sup>99</sup>Tc sulfur colloid</b>                                                                                                | <b>cRGDY-PEG-Cy5.5-C' dots</b>                                                                                                                                                                                                                                                                                        |
|------------------------|-----------------------------------------------------------------------------------------------------------------------------------------------------------|-----------------------------------------------------------------------------------------------------------------------------------------------------------------------------------------------------------------------------------------------------------------------------------------------------------------------|
| <b>Technique</b>       | Wider exposure of surgical field and more extensive dissection to identify SLNs; increasing potential to injure adjacent vital structures, such as nerves | Direct path to deep nodes guided by optical signal (~2.0 cm)<br><br>Less exposure and dissection needed for SLN detection, allowing targeted removal of SLNs while minimizing risk to adjacent nerves                                                                                                                 |
| <b>Anesthesia time</b> | Longer anesthesia times due to lack of visualization                                                                                                      | Shorter anesthesia times due to: <ul style="list-style-type: none"> <li>• changes in surgical approach</li> <li>• reduced tissue dissection</li> <li>• identification of small SLNs not otherwise detected with standard of care agents</li> <li>• improved discrimination of the primary lesion from SLNs</li> </ul> |
| <b>Sensitivity</b>     | Cannot visualize SLNs directly or discriminate nodes at different depths; cannot detect very small nodes (<4mm)                                           | Direct high contrast visualization of SLNs through the skin or up to ~2 cm deep to the skin surface. Can detect microscopic disease (< 2-3 mm)                                                                                                                                                                        |
| <b>Resolution</b>      | Preoperative Scan:<br>SPECT-CT: ~5-6 mm<br>(~5 x 10 <sup>8</sup> cells <sup>a</sup> )                                                                     | Intraoperative Scan:<br>Fluorescence camera: <60 microns<br>(approx. < 1 x 10 <sup>6</sup> cells)                                                                                                                                                                                                                     |

- a. For <sup>99m</sup>Tc sulfur colloid: Based on a ~ 5 mm diameter focus on SPECT-CT, ~5x10<sup>8</sup> cells can be detected assuming, to first order, a cell density of 10<sup>9</sup> cells/mm<sup>3</sup>. This is at least 2 orders of magnitude worse than the approximate cell numbers detectable with the Quest Spectrum™ fluorescence camera system.

## eReferences.

1. Melanoma: Cutaneous, Version 1.2021, NCCN Clinical Practice Guidelines in Oncology. November 5, 2020 [https://www.nccn.org/professionals/physician\\_gls/pdf/cutaneous\\_melanoma.pdf](https://www.nccn.org/professionals/physician_gls/pdf/cutaneous_melanoma.pdf)
2. Ma K, Mendoza C, Hanson M, Werner-Zwanziger U, Zwanziger J, Wiesner U. Control of Ultrasmall Sub-10 nm Ligand-Functionalized Fluorescent Core–Shell Silica Nanoparticle Growth in Water. *Chemistry of Materials*. 2015/06/09 2015;27(11):4119-4133. doi:10.1021/acs.chemmater.5b01222
3. Ma K, Zhang D, Cong Y, Wiesner U. Elucidating the Mechanism of Silica Nanoparticle PEGylation Processes Using Fluorescence Correlation Spectroscopies. *Chemistry of Materials*. 2016/03/08 2016;28(5):1537-1545. doi:10.1021/acs.chemmater.6b00030
4. Barteau KP, Ma K, Kohle FFE, et al. Quantitative Measure of the Size Dispersity in Ultrasmall Fluorescent Organic-Inorganic Hybrid Core-Shell Silica Nanoparticles by Small-angle X-ray Scattering. *Chem Mater*. Feb 12 2019;31(3):643-657. doi:10.1021/acs.chemmater.8b04369
5. Chen F, Ma K, Benezra M, et al. Cancer-Targeting Ultrasmall Silica Nanoparticles for Clinical Translation: Physicochemical Structure and Biological Property Correlations. *Chem Mater*. 2017;29(20):8766-8779. doi:10.1021/acs.chemmater.7b03033
