# Supplementary material for: Use of Ultrasmall Core-Shell Fluorescent Silica Nanoparticles for Image-Guided Sentinel Lymph Node Biopsy in Head and Neck Melanoma: A Nonrandomized Clinical Trial
Source: PubMed Central journal article supplement (PMC7974643; doi:10.1001/jamanetworkopen.2021.1936), 2021-03-18
Supplement: jamanetwopen-e211936-s003.pdf [file jamanetwopen-e211936-s003.pdf]

## Data Sharing Statement

Zanoni. Use of Ultrasmall Core-Shell Fluorescent Silica Nanoparticles for Image-Guided Sentinel Lymph Node Biopsy in Head and Neck Melanoma. *JAMA Netw Open*. Published March 18, 2021.  
doi:10.1001/jamanetworkopen.2021.1936

### Data

**Data available:** Yes

**Data types:** Deidentified participant data

**How to access data:** [bradburm@mskcc.org](mailto:bradburm@mskcc.org)

**When available:** With publication

### Supporting Documents

**Document types:** None

### Additional Information

**Who can access the data:** researchers whose proposed use of the data has been approved

**Types of analyses:** for a specified purpose

**Mechanisms of data availability:** signed data access agreement
